# Supplementary material for: Enhanced photocatalytic activity of titanium dioxide in nitrogen fixation by the photon localization effect of SiO2 opal photonic crystals
Source: Royal Society of Chemistry journal article supplement (doi:10.1039/d2nj04367j), 2022-01-01
Supplement: d2nj04367j1.pdf [file d2nj04367j1.pdf]

## **Supporting Information**

# **Enhanced Photocatalytic Activity of Titanium Dioxide in Nitrogen Fixation by Photon Localization Effect of SiO<sub>2</sub> Opal Photonic Crystal**

**Sheng Chen, Ji-Nan He, Ying-min Xu, Sheng-Li Chen\*, Ai-Jun Wang**

State Key Laboratory of Heavy Oil Processing, College of Chemical Engineering and  
Environment, China University of Petroleum, Beijing 102249, People's Republic of  
China

## 1. The detailed preparation procedures of SiO<sub>2</sub> microspheres

One mixture containing methanol anhydrous, ammonia and ultra-pure water and another mixture containing methanol anhydrous and Tetraethoxysilane were concurrently dropped into the seed solution including methanol anhydrous, LUDOX AS-40 colloidal silica, ultra-pure water and ammonia under stirring condition at 198 rpm. After all the reagents were added dropwise, the SiO<sub>2</sub> suspension was continuously stirred for 2 hours, and finally monodisperse SiO<sub>2</sub> microspheres with suitable diameter were sorted out by the gravity settling method.

## 2. Calculation of UV-Vis-to-ammonia efficiency

The catalytic experiment for determining UV-Vis-to-ammonia efficiency(E) was performed in pure water (60 mL) without sacrificial reagent, and the irradiation area was 38 cm<sup>2</sup>. TiO<sub>2</sub>/SiO<sub>2</sub> opal composite membrane was used as the photocatalyst. The 500 W Xe lamp (Zolix LSH-X500) was employed as the light source. The E was determined by the following equation:

$$E = \frac{\Delta G_A \times n_A}{W \times S \times t} \times 100\%$$

where  $\Delta G_A$  is the Gibbs free energy for ammonia generation from water and N<sub>2</sub> (339 kJ • mol<sup>-1</sup>);  $n_A$  is the molar number of generated ammonia;  $W$ ,  $S$  and  $t$  represent the incident light intensity, irradiation area and time, respectively.

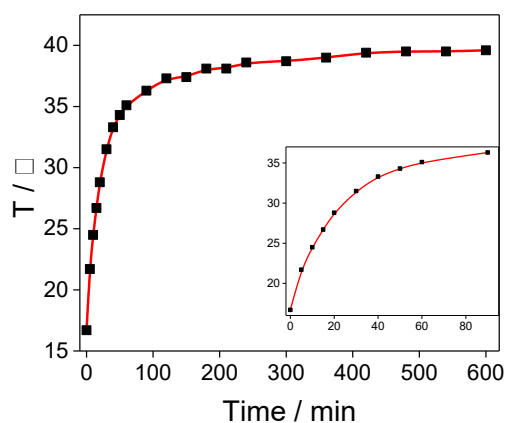

**Figure S1.** The change of reaction temperature with time.

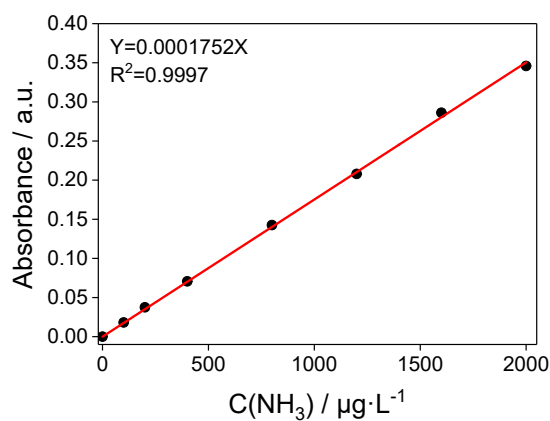

**Figure S2.** Standard curve of  $\text{NH}_4^+$  with Nessler's reagent.

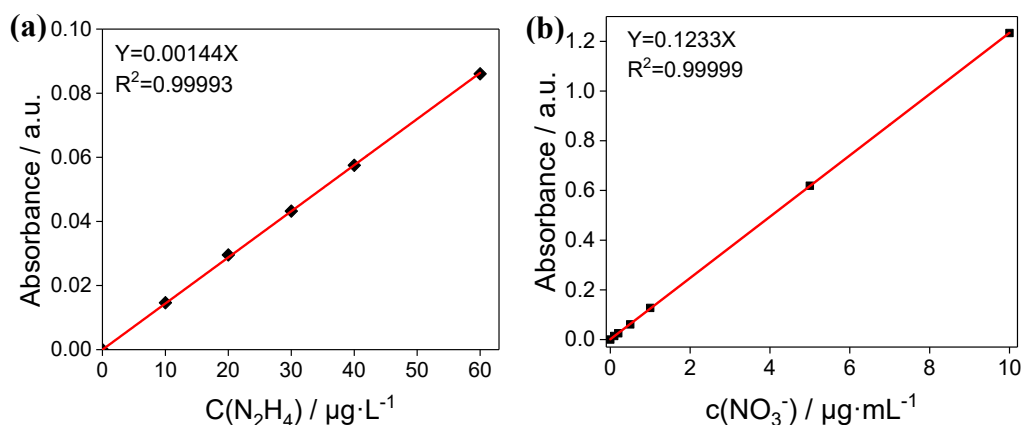

**Figure S3.** (a) Standard curve of  $\text{N}_2\text{H}_4$  with para-(dimethylamino) benzaldehyde; (b) standard curve for  $\text{NO}_3^-$  and ammonium sulfamate.

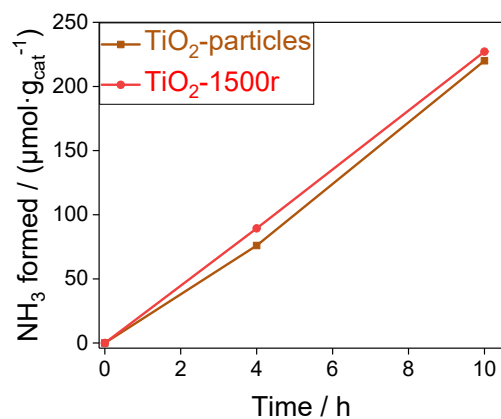

**Figure S4.**  $\text{N}_2$  fixation catalytic performance of  $\text{TiO}_2$ -1500r and  $\text{TiO}_2$ -particles photocatalysts. Reaction conditions: pure water (60 mL), catalyst (38 cm<sup>2</sup>); light irradiation conditions: full-spectrum, 2.8mW·cm<sup>-2</sup>.

(b)

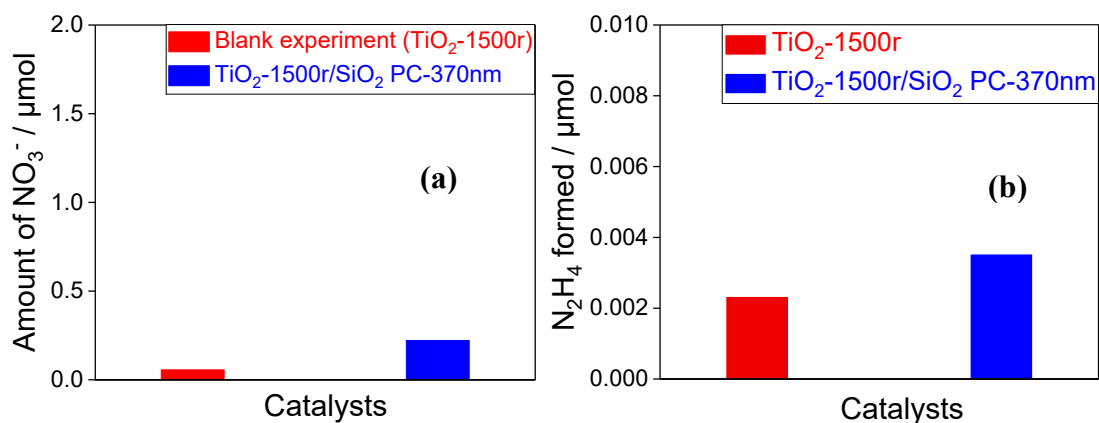

**Figure S5.** (a) Blank experiment for NO<sub>3</sub><sup>-</sup> detection. Reaction conditions: pure water (60 mL), TiO<sub>2</sub>-1500r catalyst (38 cm<sup>2</sup>), no light. And NO<sub>3</sub><sup>-</sup> formed in phototatalytic reactions over TiO<sub>2</sub>-1500r/SiO<sub>2</sub> PC-370nm catalysts. (b) Hydrazine formed in phototatalytic reactions over TiO<sub>2</sub>-1500r, TiO<sub>2</sub>-1500r/SiO<sub>2</sub> PC-370nm catalysts.

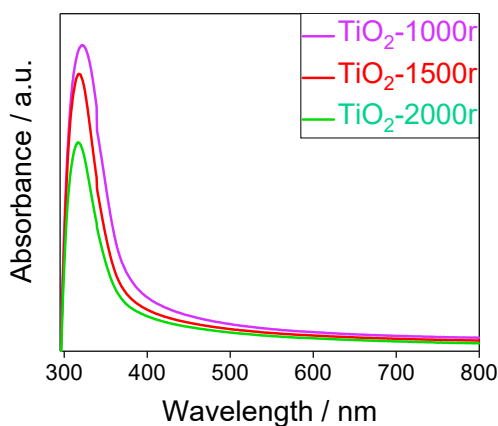

**Figure S6.** The UV-Vis absorption spectra of TiO<sub>2</sub> films with different thicknesses.

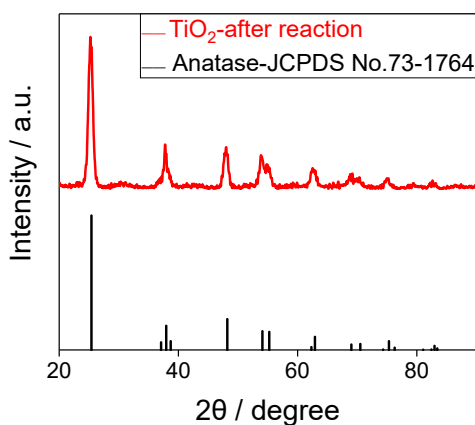

**Figure S7.** X-ray diffraction patterns of the reacted TiO<sub>2</sub>.

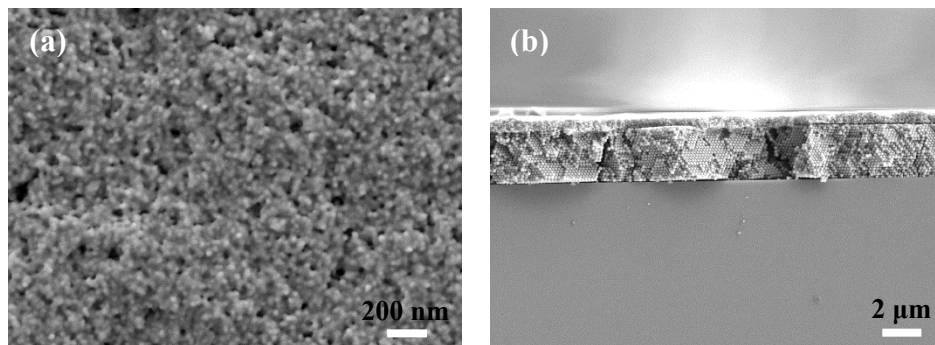

**Figure S8.** SEM images of top view (a) and cross section (b) of the reacted  $\text{TiO}_2$ -1500r/ $\text{SiO}_2$  PC-370nm composite membranes.

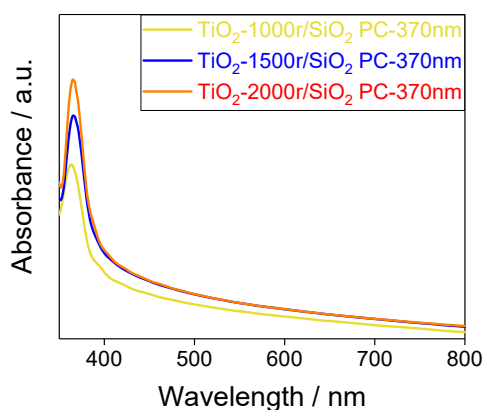

**Figure S9.** The UV-Vis absorption spectra of  $\text{SiO}_2$  PC-370nm in  $\text{TiO}_2$ -1000r/ $\text{SiO}_2$  PC-370nm,  $\text{TiO}_2$ -1500r/ $\text{SiO}_2$  PC-370nm and  $\text{TiO}_2$ -2000r/ $\text{SiO}_2$  PC-370nm photocatalysts, respectively.

**Table S1.** Nitrogen Fixation Rate of Various Photocatalysts for Photocatalytic  $\text{N}_2$  Fixation

| Catalyst                                                                                         | Reaction solvent | Light Source                             | Hole scavenger   | Ammonia production rate                                               | Ref. |
|--------------------------------------------------------------------------------------------------|------------------|------------------------------------------|------------------|-----------------------------------------------------------------------|------|
| <b>0.2 wt% Fe-doped <math>\text{TiO}_2</math></b>                                                | Water            | 360-W Hg-Arc Lamp (UV)                   | No               | $10\mu\text{mol}\cdot\text{g}_{\text{cat}}^{-1}\cdot\text{h}^{-1}$    | 11   |
| <b>0.4 wt% Co-doped <math>\text{TiO}_2</math></b>                                                | Water            | 360-W Hg-Arc Lamp (UV)                   | No               | $6.3\mu\text{mol}\cdot\text{g}_{\text{cat}}^{-1}\cdot\text{h}^{-1}$   | 11   |
| <b>0.4 wt% Mo-doped <math>\text{TiO}_2</math></b>                                                | Water            | 360-W Hg-Arc Lamp (UV)                   | No               | $6.7\mu\text{mol}\cdot\text{g}_{\text{cat}}^{-1}\cdot\text{h}^{-1}$   | 11   |
| <b>Defect <math>\text{TiO}_2</math></b>                                                          | Pure water       | Hg lamp ( $\lambda>280\text{nm}$ )       | No               | $0.73\mu\text{mol}\cdot\text{g}_{\text{cat}}^{-1}\cdot\text{h}^{-1}$  | 12   |
| <b>Defective <math>\text{TiO}_2</math> nanobamboo</b>                                            | Pure water       | 300 W Xe lamp (Full spectrum)            | No               | $48.3\text{ mg}\cdot\text{m}^{-2}\cdot\text{h}^{-1}$                  | 13   |
| <b><math>\text{TiO}_2</math>/Sr<math>\text{TiO}_3</math>/g-<math>\text{C}_3\text{N}_4</math></b> | Water            | 300 W Xe lamp (AM 1.5G)                  | 10 vol% methanol | $219.2\mu\text{mol}\cdot\text{g}_{\text{cat}}^{-1}\cdot\text{h}^{-1}$ | 14   |
| <b>Fe-<math>\text{TiO}_2</math>/Au</b>                                                           | Deionized water  | 300 W Xe lamp ( $\lambda>420\text{nm}$ ) | No               | $22.4\mu\text{mol}\cdot\text{g}_{\text{cat}}^{-1}\cdot\text{h}^{-1}$  | 15   |
| <b>Fe-doped <math>\text{TiO}_2</math>-<math>\text{SiO}_2</math></b>                              | Water            | 300 W Xe lamp (Full spectrum)            | No               | $32\mu\text{mol}\cdot\text{g}_{\text{cat}}^{-1}\cdot\text{h}^{-1}$    | 16   |

|                                                       |                  |                               |    |                                                                       |           |
|-------------------------------------------------------|------------------|-------------------------------|----|-----------------------------------------------------------------------|-----------|
| <b>F-Vo-TiO<sub>2</sub></b>                           | Deionized water  | 300 W Xe lamp (Full spectrum) | No | 206 $\mu\text{mol}\cdot\text{g}_{\text{cat}}^{-1}\cdot\text{h}^{-1}$  | 18        |
| <b>TiO<sub>2</sub>/Au/a-TiO<sub>2</sub></b>           | Deionized water  | 300 W Xe lamp (AM 1.5G)       | No | 13.4 $\text{nmol}\cdot\text{cm}^{-2}\cdot\text{h}^{-1}$               | 42        |
| <b>TiO<sub>2</sub>-1500r/SiO<sub>2</sub> PC-370nm</b> | Ultra-pure water | 500 W Xe lamp (Full spectrum) | No | 31 $\mu\text{mol}\cdot\text{g}_{\text{cat}}^{-1}\cdot\text{h}^{-1}$   | this work |
| <b>TiO<sub>2</sub>-2000r/SiO<sub>2</sub> PC-370nm</b> | Ultra-pure water | 500 W Xe lamp (Full spectrum) | No | 42.6 $\mu\text{mol}\cdot\text{g}_{\text{cat}}^{-1}\cdot\text{h}^{-1}$ | this work |
